# Supplementary material for: Self-reducing precursors for aluminium metal thin films: evaluation of stable aluminium hydrides for vapor phase aluminium deposition
Source: Royal Society of Chemistry journal article supplement (doi:10.1039/d4dt00709c), 2024-01-01
Supplement: d4dt00709c1.pdf [file d4dt00709c1.pdf]

# Self-reducing Precursors for Aluminium Metal Thin Films: Evaluation of Stable Aluminium Hydrides for Vapor Phase Aluminium Deposition

Niklas Huster,<sup>a</sup> Rita Mullins,<sup>b</sup> Michael Nolan,<sup>b</sup> Anjana Devi<sup>a,c,d,e</sup>

<sup>a</sup> Inorganic Materials Chemistry, Faculty of Chemistry and Biochemistry, Ruhr University Bochum, Universitätsstr. 150, 44801 Bochum, Germany

<sup>b</sup> Tyndall National Institute, Lee Maltings, University College Cork, Cork T12 R5CP, Ireland

<sup>c</sup> Leibniz Institute for Solid State and Materials Research, Helmholtzstr. 20, 01069 Dresden, Germany

<sup>d</sup> Fraunhofer Institute for Microelectronic Circuits and Systems (IMS), Finkenstr. 61, 47057, Duisburg, Germany

<sup>e</sup> Chair of Materials Chemistry, TU Dresden, Bergstr. 66, 01069, Germany

Corresponding author e-mail: [anjana.devi@ruhr-uni-bochum.de](mailto:anjana.devi@ruhr-uni-bochum.de)

## Supplementary Information

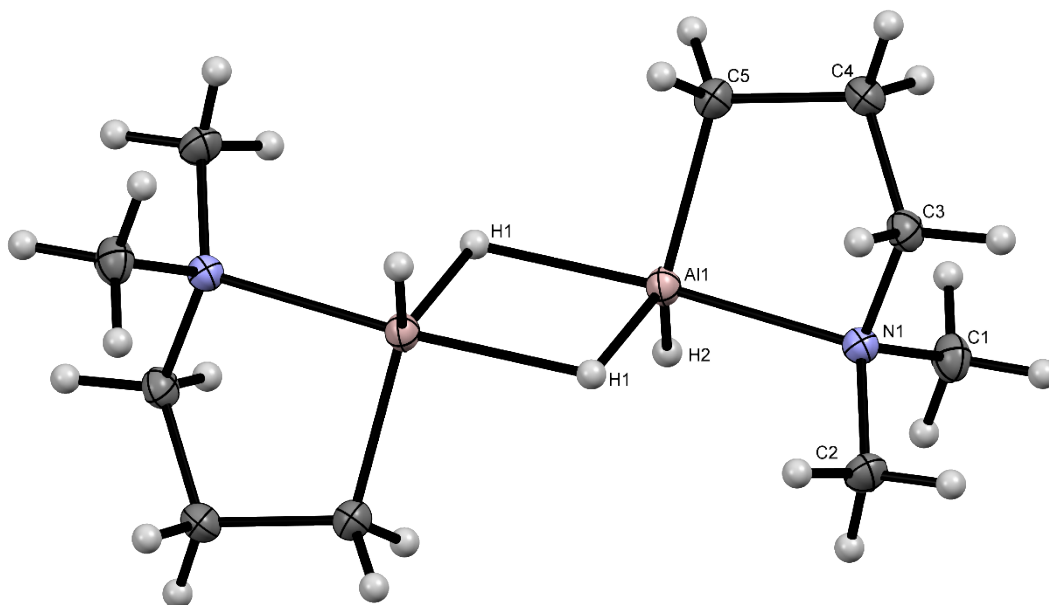

Fig.\_SI 1 Solid state structure with the displacement ellipsoid plot (50 % probability) of  $[\text{Al}(\text{DMP})\text{H}_2]_2$  (**1**).

Table\_SI 1 Crystallographic data and structure refinement for  $[\text{Al}(\text{DMP})\text{H}_2]_2$  (**1**).

|                                       |                                                                  |                                                                                       |
|---------------------------------------|------------------------------------------------------------------|---------------------------------------------------------------------------------------|
| Empirical formula                     | $\text{C}_{10}\text{H}_{28}\text{Al}_2\text{N}_2$                |                                                                                       |
| Formula weight                        | 230.30                                                           |                                                                                       |
| Temperature                           | 293(2) K                                                         |                                                                                       |
| Wavelength $\lambda$                  | 1.54184 Å (Cu $K\alpha$ )                                        |                                                                                       |
| Crystal system                        | triclinic                                                        |                                                                                       |
| Space group                           | P -1 (no. 2)                                                     |                                                                                       |
| Unit cell dimensions                  | $a = 7.0931(5)$ Å<br>$b = 7.1791(6)$ Å<br>$c = 7.9448(6)$ Å      | $\alpha = 65.927(7)^\circ$<br>$\beta = 79.774(6)^\circ$<br>$\gamma = 85.949(6)^\circ$ |
| Volume                                | $363.51(5)$ Å <sup>3</sup>                                       |                                                                                       |
| Z                                     | 1                                                                |                                                                                       |
| Density $\rho$ (calculated)           | 1.052 g/cm <sup>3</sup>                                          |                                                                                       |
| Absorption coefficient $\mu$          | 1.569 mm <sup>-1</sup>                                           |                                                                                       |
| F(000)                                | 128                                                              |                                                                                       |
| Crystal size                          | 0.297 x 0.189 x 0.185 mm <sup>3</sup>                            |                                                                                       |
| Theta range for data collection       | 6.184 to 73.010°                                                 |                                                                                       |
| Index ranges                          | -8 ≤ h ≤ 8, -8 ≤ k ≤ 8, -9 ≤ l ≤ 7                               |                                                                                       |
| Reflections collected                 | 4027                                                             |                                                                                       |
| Independent reflections               | 1414 [ $R_{\text{int}} = 0.0146$ , $R_{\text{sigma}} = 0.0149$ ] |                                                                                       |
| Completeness to theta = 67.684°       | 99.9 %                                                           |                                                                                       |
| Absorption correction                 | multi-scan                                                       |                                                                                       |
| Max. and min. transmission            | 1.00000 and 0.86950                                              |                                                                                       |
| Refinement method                     | full-matrix least-squares on $F^2$                               |                                                                                       |
| Data / restraints / parameters        | 1414 / 0 / 101                                                   |                                                                                       |
| Goodness-of-fit on $F^2$              | 1.067                                                            |                                                                                       |
| Final R indices [ $I > 2 \sigma(I)$ ] | $R_1 = 0.0237$ , $wR_2 = 0.0633$                                 |                                                                                       |
| R indices (all data)                  | $R_1 = 0.0249$ , $wR_2 = 0.0643$                                 |                                                                                       |
| Extinction coefficient                | n/a                                                              |                                                                                       |
| Largest diff. peak and hole           | 0.247 and -0.157 e Å <sup>-3</sup>                               |                                                                                       |

**Table\_SI 2** Selected bond distances and bond angles for  $[\text{Al}(\text{DMP})\text{H}_2]_2$  (**1**). Hydrogen H1\* is corresponding to dimer molecule.

| Bond length (Å) |           |
|-----------------|-----------|
| Al1 – N1        | 2.125(1)  |
| Al1 – C5        | 1.986(1)  |
| Al1 – H2        | 1.54(1)   |
| Al1 – H1        | 1.59(1)   |
| Al1 – H1*       | 1.92(2)   |
| N1 – C1         | 1.481(1)  |
| N1 – C2         | 1.479(2)  |
| N1 – C3         | 1.493(1)  |
| C3 – C4         | 1.524(2)  |
| C4 – C5         | 1.538(2)  |
| Bond angle (°)  |           |
| N1 – Al1 – H2   | 96.9(6)   |
| N1 – Al1 – H1   | 93.4(5)   |
| H1 – Al1 – H2   | 115.1(8)  |
| H1 – Al1 – H1*  | 75.2(7)   |
| C1 – N1 – C2    | 108.73(9) |
| C1 – N1 – C3    | 109.59(9) |
| C2 – N1 – C3    | 109.83(9) |
| C1 – N1 – Al1   | 110.66(7) |
| C2 – N1 – Al1   | 114.53(7) |
| C3 – N1 – Al1   | 103.35(7) |
| N1 – C3 – C4    | 110.26(9) |
| C3 – C4 – C5    | 109.5(1)  |
| C4 – C5 – Al1   | 108.40(8) |
| C5 – Al1 – H1   | 128.1(6)  |
| C5 – Al1 – H2   | 116.2(5)  |
| C5 – Al1 – N1   | 87.37(4)  |

**Table\_SI 3** Summarized onsets of volatilization ( $T_{\text{vol.}}$ ) determined by 1 % mass loss taken from TGA for compound 1 – 9.

| No. | Name                                                                         | $T_{\text{vol.}}$ (°C) |
|-----|------------------------------------------------------------------------------|------------------------|
| 1   | $[\text{Al}(\text{DMP})\text{H}_2]_2$                                        | 74.1                   |
| 2   | $\text{Al}(\text{DMP})\text{HCl}$                                            | 87.5                   |
| 3   | $\text{Al}(\text{DMP})\text{HMe}$                                            | 56.8                   |
| 4   | $\text{AlH}_3:\text{NMe}_3$                                                  | 51.5                   |
| 5   | $[\text{AlH}_2\text{NMe}_2]_3$                                               | 58.4                   |
| 6   | $\text{AlH}_2\text{NEt}_2$                                                   | 47.9                   |
| 7   | $\text{Al}(\text{Me}_2\text{NCH}_2\text{CH}_2\text{N}^i\text{Bu})\text{H}_2$ | 67.2                   |
| 8   | $[\text{Al}(\text{Me}_2\text{NCH}_2\text{CH}_2\text{NMe})\text{H}_2]_2$      | 116.9                  |
| 9   | $\text{Al}(\text{Me}_2\text{NCH}_2\text{CH}_2\text{NH})\text{H}_2$           | 78.9                   |

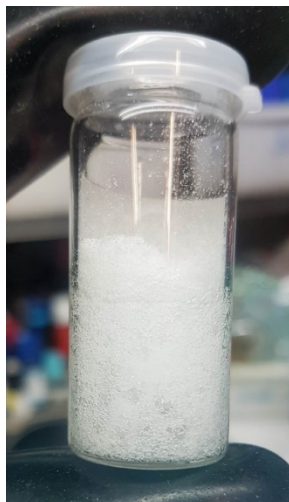

**Fig.\_SI 2** Compound 9 after one week of storage at room temperature under inert conditions. The formation of a foam like, brittle solid was observed.
